# Supplementary material
Source: PubMed Central journal article supplement (PMC4737954)
Supplement: NIHMS741931-supplement-Supplemental.pdf [file NIHMS741931-supplement-Supplemental.pdf]

# Supporting Information

## Sandwich-format 3D printed microfluidic mixers: a flexible platform for multi-probe analysis

Drew P. Kise, Michael J. Reddish and R. Brian Dyer

### I. COMSOL simulations

Numerical simulations were carried out to assess the linear velocity profile of each mixer's geometry that was tested. A 2D finite element model was computed on COMSOL Multiphysics Version 4.3a software (Comsol Inc., Stockholm, Sweden) using the parameters listed below (Table S1) and an extra-fine mesh. The models (Figure S1) were built in COMSOL using the dimensions and angles of the mixer, determined from images taken with the Olympus microscope. The simulations were performed by solving the incompressible Navier-Stokes equation and calculating the velocity vector at each element. The calculations used the physics package "Laminar Flow" to model the fluid dynamics.

Table S1: Parameters used for COMSOL numerical simulations

| Mixer           | Flow Velocities (m/s)                                    |
|-----------------|----------------------------------------------------------|
| Cross-shaped    | D <sub>2</sub> O: 0.0057 (for 3 $\mu\text{L min}^{-1}$ ) |
|                 | H <sub>2</sub> O: 0.095 (for 50 $\mu\text{L min}^{-1}$ ) |
| Droplet forming | Fluorescein: 0.0002 (for 0.25 $\mu\text{L min}^{-1}$ )   |
|                 | KI: 0.0002 (for 0.25 $\mu\text{L min}^{-1}$ )            |
|                 | Hexanes: 0.0133 (for 14 $\mu\text{L min}^{-1}$ )         |
| Serpentine      | Methyl Yellow: 0.012 (for 20 $\mu\text{L min}^{-1}$ )    |
|                 | Ethanol: 0.012 (for 20 $\mu\text{L min}^{-1}$ )          |

Table S2: 3D printing parameters

| Parameter          | Value   |
|--------------------|---------|
| Nozzle diameter    | 0.35 mm |
| Print speed        | 10 mm/s |
| Nozzle Temperature | 220 C   |

|                 |             |
|-----------------|-------------|
| Bed Temperature | 70 C        |
| Nozzle Fan      | 100%        |
| Layer height    | 0.2 mm      |
| Fill Pattern    | Rectilinear |
| Extrusion width | 0.26 mm     |
| Infill density  | 0.4         |

Table S3: Printed mixer channel diameter measurements

| <b>Annealed status</b> | <b>Channel pixel width (pix)*</b> | <b>Channel diameter (<math>\mu\text{m}</math>)</b> |
|------------------------|-----------------------------------|----------------------------------------------------|
| pre-                   | 727                               | 400                                                |
| pre-                   | 665                               | 366                                                |
| pre-                   | 731                               | 402                                                |
| pre-                   | 856                               | 471                                                |
| pre-                   | 715                               | 393                                                |
| post-                  | 358                               | 197                                                |
| post-                  | 207                               | 114                                                |
| post-                  | 291                               | 160                                                |
| post-                  | 196                               | 108                                                |
| post-                  | 309                               | 170                                                |
| post-                  | 245                               | 135                                                |
| post-                  | 255                               | 140                                                |
| post-                  | 309                               | 170                                                |
| post-                  | 304                               | 167                                                |

\*Microscope resolution is 0.55  $\mu\text{m}/\text{pix}$

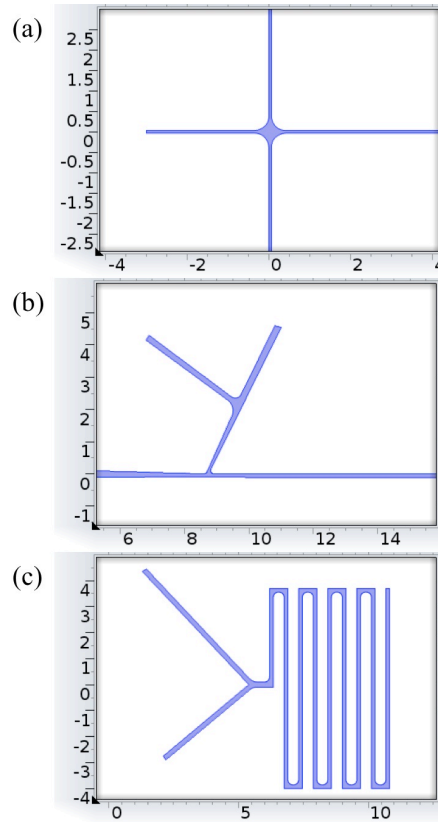

Figure S1: Geometries of the three mixers tested (a) cross-shaped mixer (b) droplet mixer (c) serpentine mixer

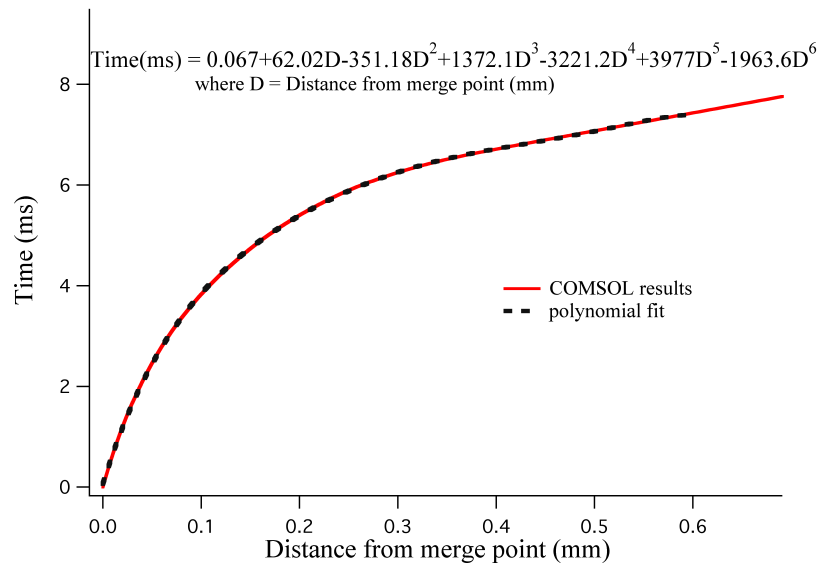

Figure S2: Time vs. distance plot showing the results from COMSOL simulations (solid line) and the polynomial fit (dashed line) used to convert from distance from the merge point in the mixer to time for the cross-shaped mixer

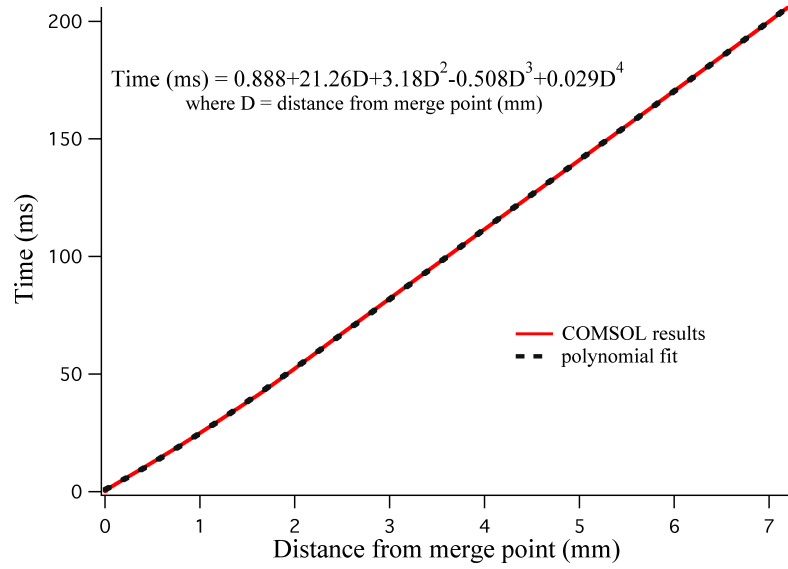

Figure S3: Time vs. distance plot showing the results from COMSOL simulations (solid line) and the polynomial fit (dashed line) used to convert from distance from the merge point in the mixer to time for the droplet mixer

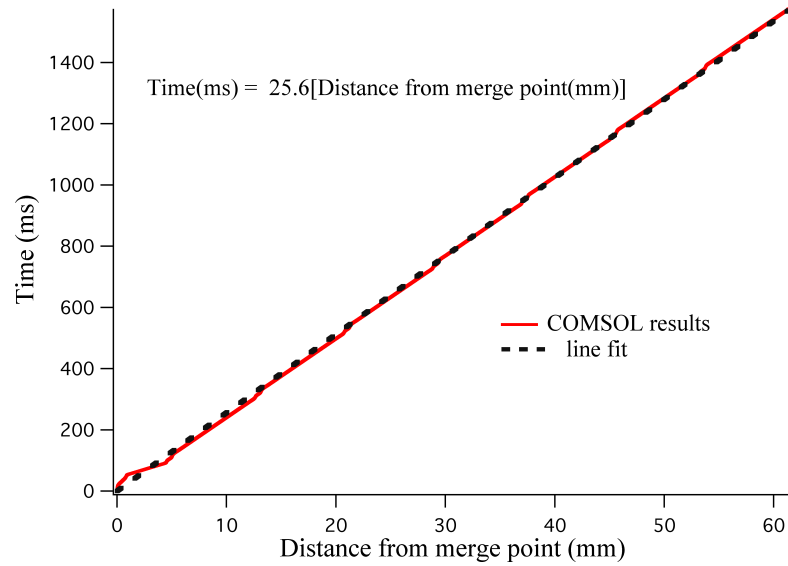

Figure S4: Time vs. distance plot showing the results from COMSOL simulations (solid line) and the linear fit (dashed line) used to convert from distance from the merge point in the mixer to time for the serpentine mixer
